# Supplementary material
Source: Springer Nature journal article supplement (https://www.springermedizin.de/resource/supplementary/12889_2010_2633_MOESM1_ESM.pdf/9486804)

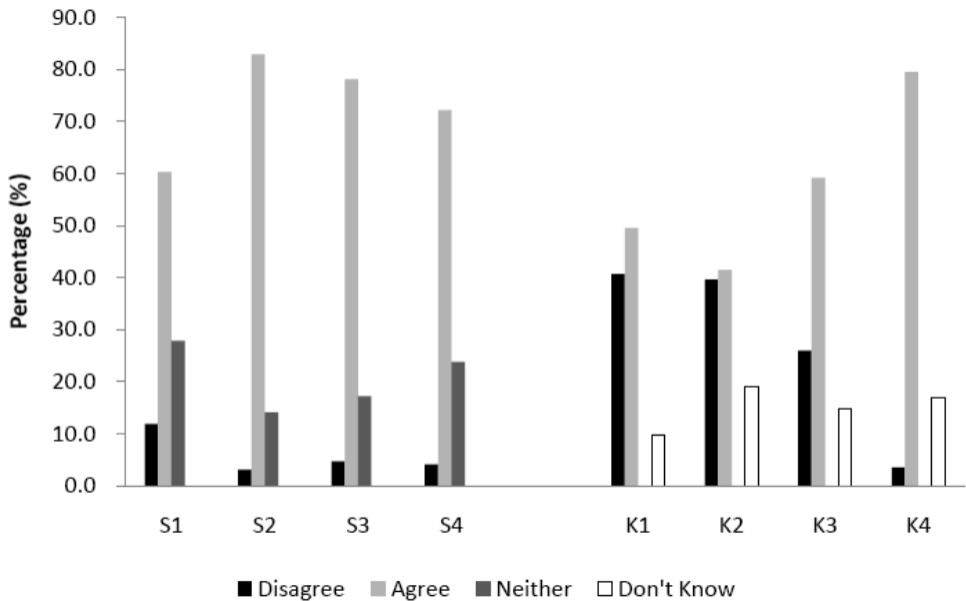

Supplement: MOESM1 [file 9486804]
